# Supplementary material
Source: PubMed Central journal article supplement (PMC8302589)
Supplement: 41433_2020_1246_MOESM1_ESM.pdf [file 41433_2020_1246_MOESM1_ESM.pdf]

## TAO 临床研究患者知情同意书

患者姓名 王硕 性别 女 年龄 30岁

我们诚挚的邀请您参加这项 TAO 临床研究。如果您同意参加本研究，请您签署知情同意书。本研究已经得到华西医院临床试验伦理委员会的审查和批准。

该研究中我们可能会应用到您的照片或图像。但具体情况如下：

1. 材料出版时不会附加您的姓名，但是，不能保证材料完全匿名，我们不会将完整照片上传，但不能排除可能会有人将您认出。
2. 材料可能会显示或包含您的医疗状况及现有的、已有的或将来会有的任何预后、治疗或手术的相关信息。
3. 文章可能会发表在一份在全球范围内发行的杂志上，会有很多人读到相关文章。

医生已充分向本人介绍了本研究的目、方法等内容，也充分告知了本人享有的权利和应履行的义务，并对本人询问的所有问题也给予了圆满的答复。同时我已经阅读了这份知情同意书，并充分理解所有内容。本人自愿参加本次临床研究，并积极配合医生完成本次研究工作。

谈话医生签名 柏白雪

受试者（或其代理人）签名：王硕

日期：2019 年 12 月 20 日

联系电话：13880490245

### TAO 临床研究患者知情同意书

患者姓名 施品地 性别 女 年龄 37

我们诚挚的邀请您参加这项 TAO 临床研究。如果您同意参加本研究，请您签署知情同意书。本研究已经得到华西医院临床试验伦理委员会的审查和批准。

该研究中我们可能会应用到您的照片或图像。但具体情况如下：

1. 材料出版时不会附加您的姓名，但是，不能保证材料完全匿名，我们不会将完整照片上传，但不能排除可能会有人将您认出。
2. 材料可能会显示或包含您的医疗状况及现有的、已有的或将来会有任何预后、治疗或手术的相关信息。
3. 文章可能会发表在一份在全球范围内发行的杂志上，会有很多人读到相关文章。

医生已充分向本人介绍了本研究的目的、方法等内容，也充分告知了本人享有的权利和应履行的义务，并对本人询问的所有问题也给予了圆满的答复。同时我已经阅读了这份知情同意书，并充分理解所有内容。本人自愿参加本次临床研究，并积极配合医生完成本次研究工作。

谈话医生签名 柏白

受试者（或其代理人）签名：施品地

日期：2019年12月25日

联系电话：13558832635

## TAO 临床研究患者知情同意书

患者姓名 陈宇 性别 男 年龄 34

我们诚挚的邀请您参加这项 TAO 临床研究。如果您同意参加本研究，请您签署知情同意书。本研究已经得到华西医院临床试验伦理委员会的审查和批准。

该研究中我们可能会应用到您的照片或图像。但具体情况如下：

1. 材料出版时不会附加您的姓名，但是，不能保证材料完全匿名，我们不会将完整照片上传，但不能排除可能会有人将您认出。
2. 材料可能会显示或包含您的医疗状况及现有的、已有的或将来会有任何预后、治疗或手术的相关信息。
3. 文章可能会发表在一份在全球范围内发行的杂志上，会有很多人读到相关文章。

医生已充分向本人介绍了本研究的目、方法等内容，也充分告知了本人享有的权利和应履行的义务，并对本人询问的所有问题也给予了圆满的答复。同时我已经阅读了这份知情同意书，并充分理解所有内容。本人自愿参加本次临床研究，并积极配合医生完成本次研究工作。

谈话医生签名 杜白宇

受试者（或其代理人）签名：陈宇

日期：2020 年 1 月 3 日

联系电话：13890363551

### TAO 临床研究患者知情同意书

患者姓名 蔡丹 性别 女 年龄 26

我们诚挚的邀请您参加这项 TAO 临床研究。如果您同意参加本研究，请您签署知情同意书。本研究已经得到华西医院临床试验伦理委员会的审查和批准。

该研究中我们可能会应用到您的照片或图像。但具体情况如下：

1. 材料出版时不会附加您的姓名，但是，不能保证材料完全匿名，我们不会将完整照片上传，但不能排除可能会有人将您认出。
2. 材料可能会显示或包含您的医疗状况及现有的、已有的或将来会有的任何预后、治疗或手术的相关信息。
3. 文章可能会发表在一份在全球范围内发行的杂志上，会有很多人读到相关文章。

医生已充分向本人介绍了本研究的目的、方法等内容，也充分告知了本人享有的权利和应履行的义务，并对本人询问的所有问题也给予了圆满的答复。同时我已经阅读了这份知情同意书，并充分理解所有内容。本人自愿参加本次临床研究，并积极配合医生完成本次研究工作。

谈话医生签名 李自云

受试者（或其代理人）签名: 蔡丹

日期: 2020 年 1 月 20 日

联系电话: 13548098722

### TAO 临床研究患者知情同意书

患者姓名 李志强 性别 男 年龄 44

我们诚挚的邀请您参加这项 TAO 临床研究。如果您同意参加本研究，请您签署知情同意书。本研究已经得到华西医院临床试验伦理委员会的审查和批准。

该研究中我们可能会应用到您的照片或图像。但具体情况如下：

1. 材料出版时不会附加您的姓名，但是，不能保证材料完全匿名，我们不会将完整照片上传，但不能排除可能会有人将您认出。
2. 材料可能会显示或包含您的医疗状况及现有的、已有的或将来会有的任何预后、治疗或手术的相关信息。
3. 文章可能会发表在一份在全球范围内发行的杂志上，会有很多人读到相关文章。

医生已充分向本人介绍了本研究的目的、方法等内容，也充分告知了本人享有的权利和应履行的义务，并对本人询问的所有问题也给予了圆满的答复。同时我已经阅读了这份知情同意书，并充分理解所有内容。本人自愿参加本次临床研究，并积极配合医生完成本次研究工作。

谈话医生签名 杜白名

受试者（或其代理人）签名： 李志强

日期： 2020 年 3 月 5 日

联系电话： 13995868760

### TAO 临床研究患者知情同意书

患者姓名 胡泽武 性别 男 年龄 32

我们诚挚的邀请您参加这项 TAO 临床研究。如果您同意参加本研究，请您签署知情同意书。本研究已经得到华西医院临床试验伦理委员会的审查和批准。

该研究中我们可能会应用到您的照片或图像。但具体情况如下：

1. 材料出版时不会附加您的姓名，但是，不能保证材料完全匿名，我们不会将完整照片上传，但不能排除可能会有人将您认出。
2. 材料可能会显示或包含您的医疗状况及现有的、已有的或将来会有任何预后、治疗或手术的相关信息。
3. 文章可能会发表在一份在全球范围内发行的杂志上，会有很多人读到相关文章。

医生已充分向本人介绍了本研究的目的是、方法等内容，也充分告知了本人享有的权利和应履行的义务，并对本人询问的所有问题也给予了圆满的答复。同时我已经阅读了这份知情同意书，并充分理解所有内容。本人自愿参加本次临床研究，并积极配合医生完成本次研究工作。

谈话医生签名 杜白岩

受试者（或其代理人）签名：胡泽武

日期：2019 年 11 月 10 日

联系电话：18113008262
